# Supplementary material for: High copy number variation of cancer-related microRNA genes and frequent amplification of DICER1 and DROSHA in lung cancer
Source: PubMed Central journal article supplement (PMC4695126; doi:10.18632/oncotarget.4351), 2015-06-22
Supplement: oncotarget-06-23399-s001.pdf [file oncotarget-06-23399-s001.pdf]

SUPPLEMENTARY FIGURES AND TABLES

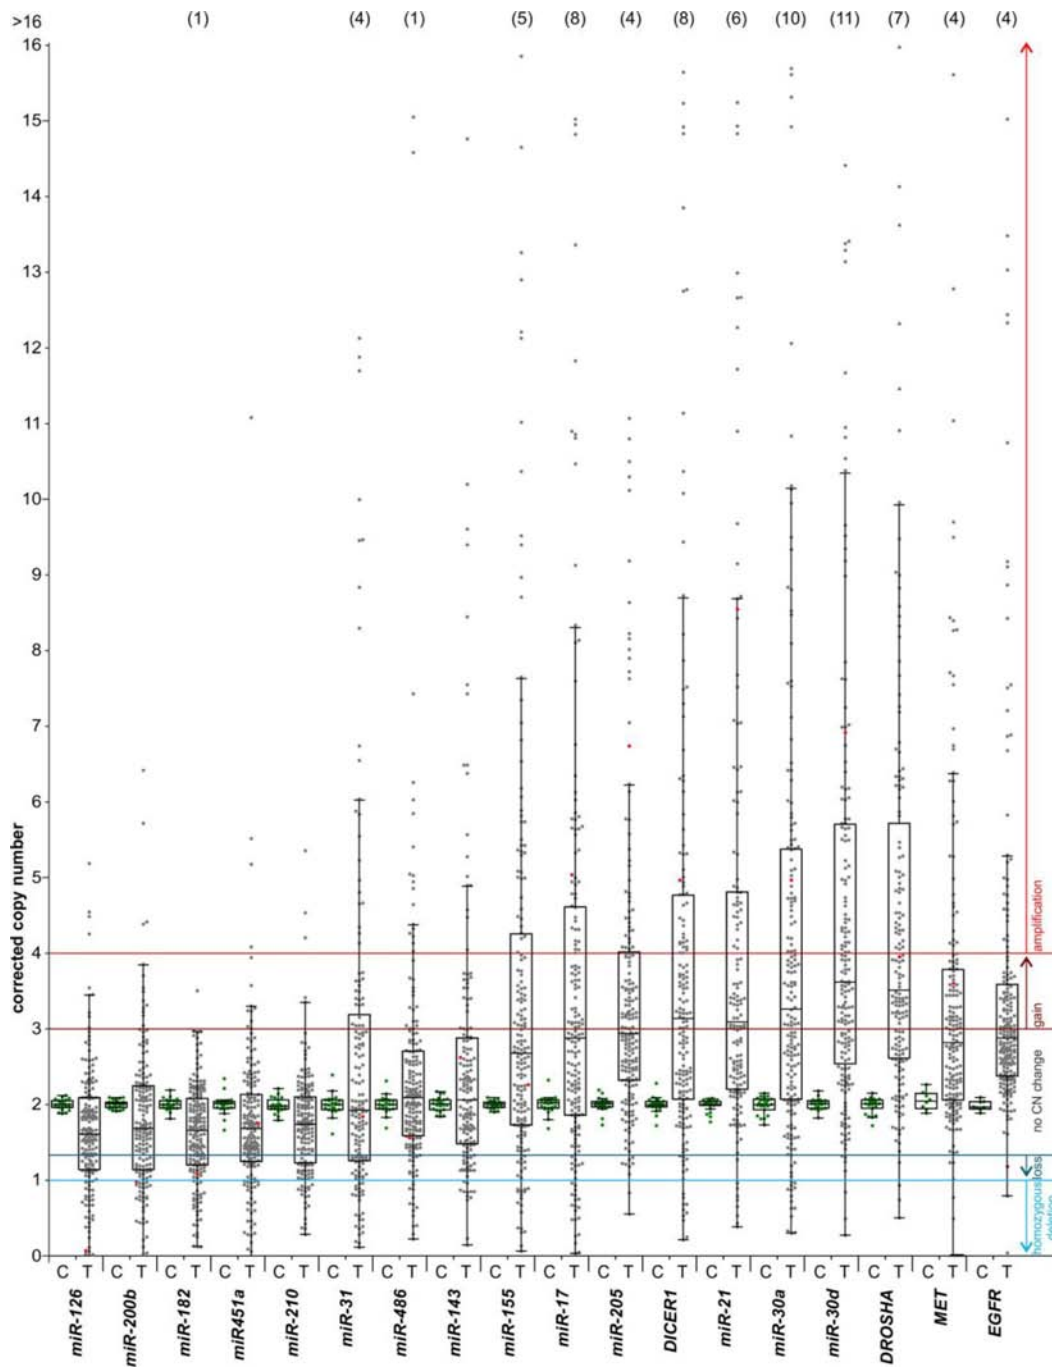

**Supplementary Figure S1: Graphical summary of the copy number variation of the analyzed genes in NSCLC samples.** The graph shows the results of copy number analysis of the selected miRNA and miRNA biogenesis genes as well as two lung cancer related oncogenes, *MET* and *EGFR*. The y-axis shows the copy number value corrected for PTC (dilution of cancer cells). Numbers in brackets (above graph) indicate samples with a copy number value >16. All other Figure legend details are the same as Figure 3A.

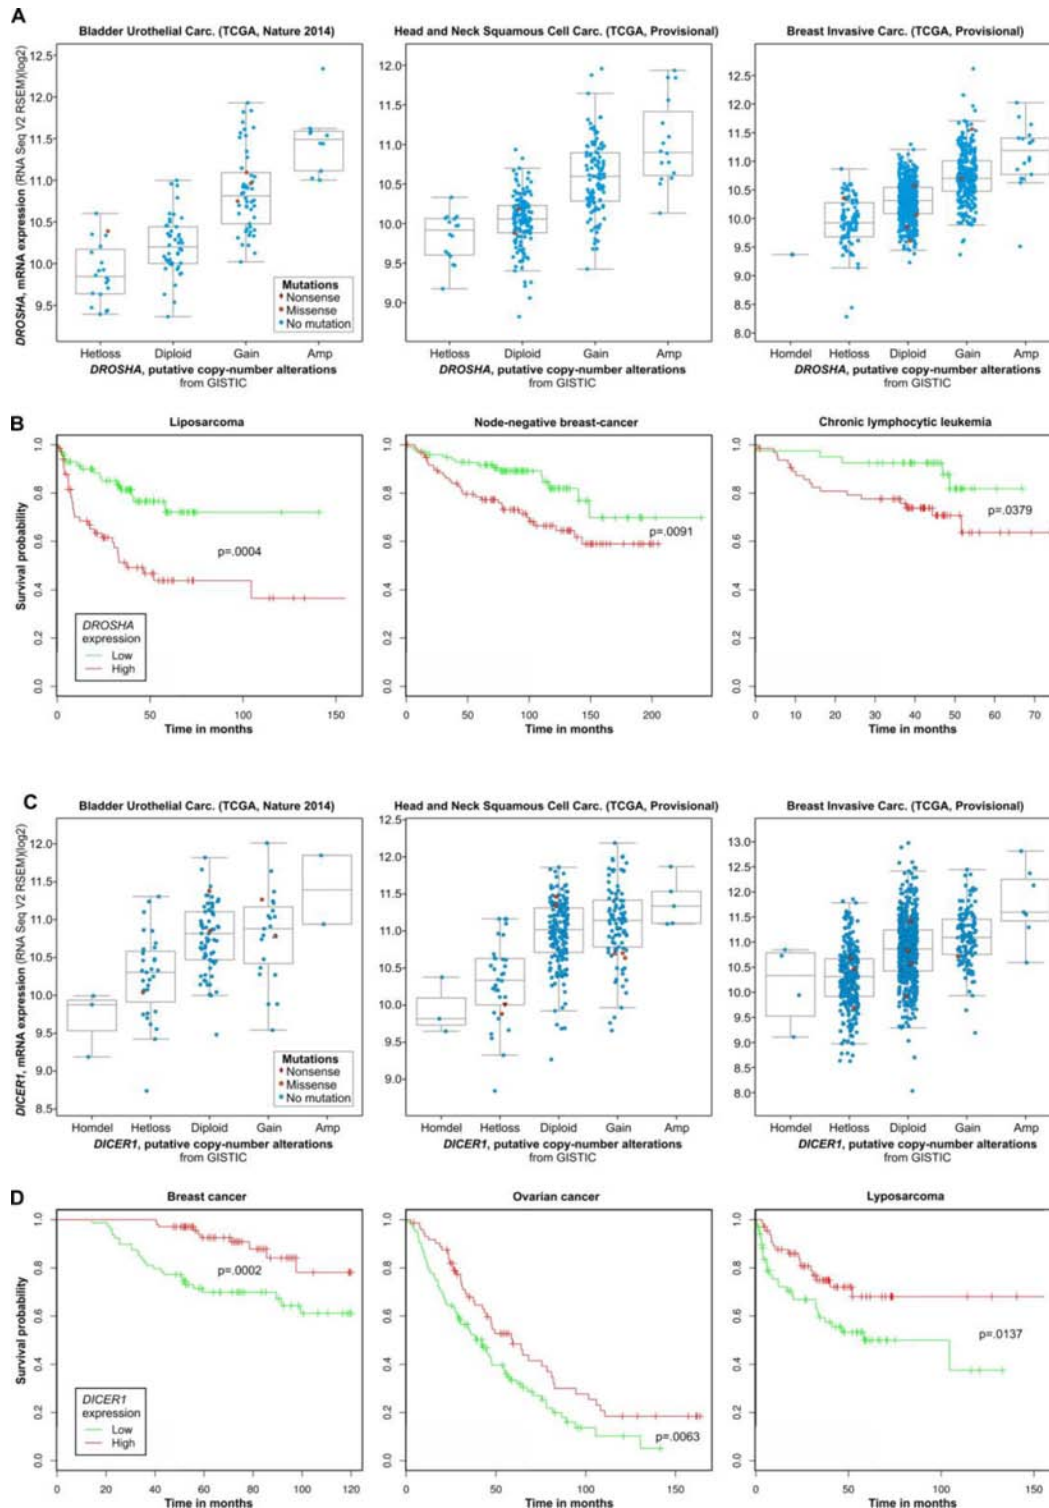

**Supplementary Figure S2: Computational analysis of clinical (survival) and oncogenomic data of *DROSHA* and *DICER1* performed with the use of datasets representing different types of cancer.** Mutual relation of copy number and expression (oncogenomic data) of *DROSHA* **A** and **B**, and *DICER1* **C** and **D**, and the relation of their expression to survival of cancer patients (clinical data). **A** and **C**) Correlation analysis of copy number categories and expression level, performed with the use of datasets (indicated above the graphs) deposited and tools available in cBioPortal for Cancer Genomics. **B** and **D**) Survival analysis performed with the use of datasets (indicated above the graphs; GEO: GSE30929, GSE11121, GSE22762, GSE24450, GSE26712, GSE30929) deposited in and tools available from the PPSURV web-portal.

**Supplementary Table S1. MLPA assays - detailed characteristics.**

**Supplementary Table S2. Relative copy number values of the analyzed regions.**

**Supplementary Table S3. Comparison of clinical data with copy number categories of analyzed miRNA and miRNA biogenesis genes.**
